# Supplementary material
Source: PubMed Central journal article supplement (PMC6763338)
Supplement: NIHMS1046020-supplement-Supplement.pdf [file NIHMS1046020-supplement-Supplement.pdf]

**Supplemental Table 1. Baseline characteristics of CKD participants by absolute weight change (in pounds) (N=872)**

|                                     | Weight gain     | No intent to lose weight, no weight $\Delta$ | Intent to lose weight |                   |                    | Unintentional weight loss |                    |
|-------------------------------------|-----------------|----------------------------------------------|-----------------------|-------------------|--------------------|---------------------------|--------------------|
|                                     |                 |                                              | no weight $\Delta$    | 10 to 19 lbs loss | $\geq 20$ lbs loss | 10 to 19 lbs loss         | $\geq 20$ lbs loss |
|                                     | N=118           | N=389                                        | N=172                 | N=51              | N=44               | N=55                      | N=43               |
|                                     | 15.1%           | 39.8%                                        | 22.6%                 | 7.4%              | 5.4%               | 5.0%                      | 4.7%               |
| Weight change (lb)                  | 19.3 $\pm$ 9.2  | -0.2 $\pm$ 2.9                               | -0.2 $\pm$ 3.4        | -12.5 $\pm$ 2.3   | -33.4 $\pm$ 13.6   | -12.4 $\pm$ 2.8           | -36.3 $\pm$ 15.7   |
| Weight change (%)                   | 10.4 $\pm$ 5.2  | -0.1 $\pm$ 1.7                               | -0.02 $\pm$ 1.86      | -7.0 $\pm$ 1.7    | -14.7 $\pm$ 6.8    | -7.1 $\pm$ 1.6            | -18.1 $\pm$ 6.9    |
| BMI 1 year ago (kg/m <sup>2</sup> ) | 31.4 $\pm$ 3.9  | 29.5 $\pm$ 4.1                               | 30.8 $\pm$ 4.0        | 31.1 $\pm$ 4.2    | 38.4 $\pm$ 7.7     | 29.9 $\pm$ 4.0            | 33.1 $\pm$ 5.1     |
| Current BMI (kg/m <sup>2</sup> )    | 34.6 $\pm$ 4.4  | 29.4 $\pm$ 4.2                               | 30.8 $\pm$ 4.0        | 28.9 $\pm$ 4.1    | 33.0 $\pm$ 8.1     | 27.8 $\pm$ 3.8            | 27.1 $\pm$ 4.7     |
| Age (year)                          | 66.4 $\pm$ 12.4 | 75.0 $\pm$ 9.4                               | 69.2 $\pm$ 10.2       | 66.6 $\pm$ 10.4   | 66.1 $\pm$ 9.5     | 77.4 $\pm$ 9.0            | 72.0 $\pm$ 11.0    |
| Male (%)                            | 38.0            | 47.3                                         | 43.5                  | 34.9              | 35.2               | 37.0                      | 32.7               |
| African American race (%)           | 10.9            | 6.8                                          | 6.1                   | 11.0              | 15.2               | 15.3                      | 20.6               |
| Smoking (%)                         | 55.2            | 48.6                                         | 51.2                  | 41.3              | 45.0               | 40.6                      | 39.8               |
| Alcohol use (%)                     | 48.9            | 54.0                                         | 51.5                  | 51.2              | 47.6               | 35.4                      | 35.0               |
| $\geq$ High school education (%)    | 68.1            | 61.3                                         | 74.8                  | 75.0              | 64.7               | 49.0                      | 46.6               |
| Diabetes (%)                        | 24.3            | 26.3                                         | 27.1                  | 26.0              | 49.6               | 20.4                      | 24.2               |
| Hypertension (%)                    | 75.9            | 77.4                                         | 75.0                  | 62.1              | 91.6               | 78.0                      | 71.6               |
| Myocardial infarction (%)           | 16.4            | 17.6                                         | 14.3                  | 21.6              | 18.2               | 7.8                       | 15.7               |
| Congestive heart failure (%)        | 15.0            | 14.0                                         | 6.1                   | 17.5              | 26.3               | 10.5                      | 25.1               |
| Stroke (%)                          | 10.4            | 11.8                                         | 8.9                   | 12.9              | 24.8               | 11.8                      | 8.9                |
| Lung disease (%)                    | 16.7            | 10.3                                         | 12.8                  | 17.8              | 16.6               | 13.7                      | 18.2               |
| Cancer (%)                          | 18.6            | 26.4                                         | 20.9                  | 27.6              | 19.0               | 21.1                      | 6.3                |
| eGFR (mL/min/1.73 m <sup>2</sup> )  | 46.6 $\pm$ 11.0 | 48.0 $\pm$ 10.7                              | 48.0 $\pm$ 8.9        | 49.8 $\pm$ 6.9    | 46.6 $\pm$ 12.3    | 45.3 $\pm$ 12.0           | 42.7 $\pm$ 15.5    |
